# Supplementary material for: Crystal chemistry of fluorcarletonite, a new mineral from the Murun alkaline complex (Russia)
Source: Copernicus journal article supplement (doi:10.5194/ejm-32-137-2020), 2020-01-29
Supplement: Supplementary file 1 [file ejm-32-137-2020-supplement.zip]

Table S1. X-ray powder diffraction data for fluorcarletonite and carletonite.

| Fluorcarletonite  |                   |                    | Carletonite (Chao, 1971) |                   |                    | hkl        |
|-------------------|-------------------|--------------------|--------------------------|-------------------|--------------------|------------|
| $I_{\text{meas}}$ | $d_{\text{meas}}$ | $d_{\text{calc.}}$ | $I_{\text{meas}}$        | $d_{\text{meas}}$ | $d_{\text{calc.}}$ |            |
| 22                | 16.92             | 16.77              | 40                       | 16.705            | 16.695             | 001        |
| 7                 | 9.419             | 9.361              | 30                       | 9.319             | 9.3185             | 110        |
| <b>76</b>         | <b>8.417</b>      | <b>8.386</b>       | <b>100</b>               | <b>8.353</b>      | <b>8.3476</b>      | <b>002</b> |
| 3                 | 6.643             | 6.619              | 20                       | 6.583             | 6.5892             | 200        |
| 6                 | 5.942             | 5.921              | 10                       | 5.890             | 5.8935             | 210        |
| 8                 | 5.597             | 5.590              | 25                       | 5.563             | 5.5650             | 003        |
| 3                 | 5.196             | 5.196              | 10                       | 5.173             | 5.1720             | 202        |
| 10                | 4.843             | 4.837              | 40                       | 4.816             | 4.8145             | 212        |
| 14                | 4.684             | 4.681              | 30                       | 4.659             | 4.6592             | 220        |
| 3                 | 4.288             | 4.271              | 10                       | 4.250             | 4.2516             | 203        |
| <b>100</b>        | <b>4.190</b>      | <b>4.187</b>       | <b>100</b>               | <b>4.171</b>      | <b>4.1672</b>      | <b>310</b> |
| 18                | 4.072             | 4.065              | <b>50</b>                | <b>4.053</b>      | <b>4.0462</b>      | <b>213</b> |
| 8                 | 3.585             | 3.589              | 5                        | 3.573             | 3.5725             | 223        |
| 15                | 3.418             | 3.422              | 25                       | 3.405             | 3.4061             | 214        |
| 20                | 3.358             | 3.354              | 40                       | 3.337             | 3.3357             | 005        |
|                   |                   |                    | 10                       | 3.236             | 3.2322             | 401        |
| 3                 | 3.216             | 3.211              | 5                        | 3.202             | 3.1962             | 410        |
| 3                 | 3.160             | 3.154              | 5                        | 3.139             | 3.1391             | 411        |
| 4                 | 3.125             | 3.123              | 10                       | 3.109             | 3.1088             | 224        |
| 18                | 3.069             | 3.069              | 40                       | 3.057             | 3.0550             | 323        |
| 8                 | 2.965             | 2.960              | 25                       | 2.945             | 2.9468             | 420        |
| 28                | 2.917             | 2.915              | <b>90</b>                | <b>2.903</b>      | <b>2.9018</b>      | <b>421</b> |
| 7                 | 2.847             | 2.848              | 15                       | 2.835             | 2.8350             | 403        |
| 27                | 2.790             | 2.791              | 40                       | 2.777             | 2.7787             | 422        |
| 20                | 2.758             | 2.762              | 15                       | 2.750             | 2.7497             | 324        |
| 14                | 2.723             | 2.725              | 20                       | 2.713             | 2.7122             | 333        |
| 3                 | 2.674             | 2.678              | 5                        | 2.667             | 2.6662             | 116        |
| 15                | 2.614             | 2.616              | 40                       | 2.604             | 2.6042             | 423        |
|                   |                   |                    | 5                        | 2.584             | 2.5844             | 510        |
| 6                 | 2.548             | 2.549              | 15                       | 2.540             | 2.5376             | 414        |
|                   |                   |                    | 10                       | 2.466             | 2.4652             | 325        |
| 3                 | 2.431             | 2.432              | 5                        | 2.421             | 2.4212             | 521        |
| 22                | 2.393             | 2.396              | <b>60</b>                | <b>2.384</b>      | <b>2.3850</b>      | <b>007</b> |
|                   |                   |                    | 10                       | 2.329             | 2.3296             | 440        |
| 7                 | 2.245             | 2.250              | 5                        | 2.265             | 2.2600             | 530        |
| 10                | 2.216             | 2.220              | 10                       | 2.239             | 2.2396             | 531        |
| 4                 | 2.174             | 2.176              | 15                       | 2.209             | 2.2094             | 425        |
| 4                 | 2.155             | 2.159              | 10                       | 2.165             | 2.1665             | 610        |
| 6                 | 2.130             | 2.133              | 10                       | 2.149             | 2.1485             | 443        |
| 7                 | 2.094             | 2.096              | 15                       | 2.121             | 2.1230             | 227        |
| 4                 | 2.073             | 2.077              | 20                       | 2.086             | 2.0869             | 008        |
| 11                | 2.042             | 2.046              | 5                        | 2.065             | 2.0676             | 621        |
|                   |                   |                    | 10                       | 2.037             | 2.0364             | 118        |
| 5                 | 2.005             | 2.006              | 5                        | 2.022             | 2.0216             | 622        |
|                   |                   |                    | 10                       | 1.966             | 1.9974             | 327        |
| 12                | 1.918             | 1.921              | 10                       | 1.971             | 1.9738             | 525        |
| 15                | 1.897             | 1.900              | 30                       | 1.912             | 1.9135             | 632        |
| 6                 | 1.870             | 1.872              | 15                       | 1.890             | 1.8917             | 337        |
| 7                 | 1.858             | 1.861              | 10                       | 1.860             | 1.8636             | 550        |
| 4                 | 1.843             | 1.846              |                          |                   |                    | 711        |
|                   |                   |                    |                          |                   |                    | 526        |
|                   |                   |                    | 5                        | 1.836             | 1.8340             | 605        |

|    |       |       |    |       |        |       |
|----|-------|-------|----|-------|--------|-------|
| 8  | 1.818 | 1.821 | 40 | 1.813 | 1.8122 | 328   |
| 3  | 1.790 | 1.794 | 5  | 1.786 | 1.7852 | 446   |
|    |       |       | 5  | 1.766 | 1.7672 | 553   |
|    |       |       | 10 | 1.748 | 1.7474 | 418   |
| 3  | 1.736 | 1.738 | 10 | 1.731 | 1.7304 | 730   |
| 3  | 1.726 | 1.717 | 10 | 1.710 | 1.7094 | 616   |
|    |       |       | 5  | 1.679 | 1.6788 | 651   |
| 3  | 1.658 | 1.660 | 5  | 1.653 | 1.6523 | 733   |
|    |       |       | 10 | 1.636 | 1.6345 | 438   |
| 10 | 1.608 | 1.610 | 30 | 1.603 | 1.6031 | 645   |
| 4  | 1.573 | 1.576 | 15 | 1.568 | 1.5692 | 743   |
| 4  | 1.553 | 1.560 | 15 | 1.553 | 1.5530 | 660   |
| 3  | 1.537 | 1.540 | 5  | 1.533 | 1.5332 | 538   |
| 6  | 1.521 | 1.524 |    |       |        | 832   |
|    |       |       | 15 | 1.517 | 1.5177 | 439   |
| 4  | 1.456 | 1.458 |    |       |        | 842   |
| 4  | 1.353 | 1.355 |    |       |        | 836   |
| 4  | 1.245 | 1.249 |    |       |        | 71.10 |
| 6  | 1.230 | 1.233 |    |       |        | 72.10 |

Table S2. Selected bond distances (Å) and angles (°) of the framework tetrahedra for fluorcarletonite.

| Fluorcarletonite |                  |  | Carletonite<br>(Chao, 1972) | Fluorcarletonite |                  |  | Carletonite<br>(Chao, 1972) |
|------------------|------------------|--|-----------------------------|------------------|------------------|--|-----------------------------|
| Si1-O1           | 1.5968(5)        |  | 1.590(3)                    | Si2-O1           | 1.6278(5)        |  | 1.625(3)                    |
| Si1-O2           | 1.5990(5)        |  | 1.588(3)                    | Si2-O2           | 1.6303(5)        |  | 1.627(3)                    |
| Si1-O5           | 1.6217(4)        |  | 1.612(4)                    | Si2-O3           | 1.5774(5)        |  | 1.567(3)                    |
| Si1-O6           | 1.6157(3)        |  | 1.613(3)                    | Si2-O4           | 1.6320(5)        |  | 1.623(4)                    |
| <Si1-O>          | <b>1.608(1)</b>  |  | <b>1.601(7)</b>             | <Si2-O>          | <b>1.617(1)</b>  |  | <b>1.611(7)</b>             |
| O1-Si1-O2        | 112.81(3)        |  | 112.8(2)                    | O1-Si2-O2        | 104.93(3)        |  | 104.7(2)                    |
| O1-Si1-O5        | 110.58(3)        |  | 110.0(2)                    | O1-Si2-O3        | 111.79(2)        |  | 112.2(2)                    |
| O1-Si1-O6        | 108.24(3)        |  | 107.9(2)                    | O1-Si2-O4        | 108.77(3)        |  | 108.4(2)                    |
| O2-Si1-O5        | 105.47(3)        |  | 106.3(2)                    | O2-Si2-O3        | 114.38(2)        |  | 114.2(2)                    |
| O2-Si1-O6        | 109.95(3)        |  | 109.8(2)                    | O2-Si2-O4        | 105.09(3)        |  | 105.1(2)                    |
| O5-Si1-O6        | 109.76(3)        |  | 110.2(2)                    | O3-Si2-O4        | 111.41(3)        |  | 111.7(2)                    |
| <O-Si1-O>        | <b>109.47(7)</b> |  | <b>109.5(5)</b>             | <O-Si2-O>        | <b>109.40(6)</b> |  | <b>109.4(5)</b>             |

1 Table S3. Selected bond distances (Å) and angles (°) for polyhedra and C-triangles for  
2 fluorcarletonite.

|                    | Fluorcarletonite | Carletonite<br>(Chao, 1972) |             | Fluorcarletonite | Carletonite<br>(Chao, 1972) |
|--------------------|------------------|-----------------------------|-------------|------------------|-----------------------------|
| <b>Polyhedra</b>   |                  |                             |             |                  |                             |
| K-O2 (×4)          | 3.1824(4)        | 3.215(3)                    | Na1-O3 (×4) | 2.3313(5)        | 2.345(4)                    |
| K-O5 (×2)          | 2.9430(5)        | 2.925(4)                    | Na1-F13     | 2.651(1)         | 2.630(4)                    |
| K-O10 (×4)         | 2.7902(6)        | 2.773(3)                    | Na1-O11(w)  | 2.339(2)         | 2.342(8)                    |
| <K-O>              | <b>2.978(1)</b>  | <b>2.98(1)</b>              | <Na1-O,F>   | <b>2.386(2)</b>  | <b>2.39(1)</b>              |
| Na2-O4             | 2.4489(8)        | 2.464(7)                    | Na3-O7 (×4) | 2.5371(6)        | 2.544(6)                    |
| Na2-O7 (×2)        | 2.3868(6)        | 2.376(5)                    | Na3-O8 (×2) | 2.3879(7)        | 2.386(7)                    |
| Na2-O10<br>(×2)    | 2.3263(7)        | 2.349(5)                    | Na3-O9 (×2) | 2.5297(8)        | 2.558(6)                    |
| Na2-O12(w)         | 2.755(1)         | 2.86(5)                     | <Na3-O >    | <b>2.498(1)</b>  | <b>2.51(2)</b>              |
| <Na2-O>            | <b>2.438(2)</b>  | <b>2.46(5)</b>              | Ca-O3       | 2.3672(5)        | 2.371(3)                    |
| <b>C-triangles</b> |                  |                             | Ca-O3'      | 2.4292(5)        | 2.434(3)                    |
| C1-O7 (×2)         | 1.2882(6)        | 1.288(7)                    | Ca-O7       | 2.5098(4)        | 2.527(3)                    |
| C1-O9              | 1.290(1)         | 1.268(7)                    | Ca-O7'      | 2.5417(4)        | 2.541(3)                    |
| O7-O7'             | 2.2512(7)        | 2.252(4)                    | Ca-O8       | 2.4482(5)        | 2.450(5)                    |
| O7-O9 (×2)         | 2.2226(8)        | 2.202(5)                    | Ca-O9       | 2.4327(2)        | 2.430(5)                    |
| O7-C1-O7'          | 121.80(7)        | 122.0(2)                    | Ca-O10      | 2.4101(5)        | 2.405(3)                    |
| O7-C1-O9           | 119.09(4)        | 119.0(2)                    | Ca-F13      | 2.5031(2)        | 2.500(4)                    |
| C2-O10 (×2)        | 1.2820(6)        | 1.266(7)                    | <Ca-O,F>    | <b>2.455(1)</b>  | <b>2.46(1)</b>              |
| C2-O8              | 1.3039(8)        | 1.298(9)                    |             |                  |                             |
| O10-O10'           | 2.2493(7)        | 2.230(4)                    |             |                  |                             |
| O8-O10 (×2)        | 2.2243(7)        | 2.201(6)                    |             |                  |                             |
| O10-C2-<br>O10'    | 122.64(7)        | 123.4(2)                    |             |                  |                             |
| O8-C2-O10          | 118.67(4)        | 118.3(2)                    |             |                  |                             |

1  
2  
3

Table S4. Band position (cm<sup>-1</sup>) and assignment for the H<sub>2</sub>O, OH<sup>-</sup> and CO<sub>3</sub><sup>2-</sup> absorption bands of the studied fluorcarletonite and literature selected chemically related phyllosilicates.

| Specimen          | Occurence                        | Chemical formula                                                                                                       | Band position                      | Band assignment                                     | References         |
|-------------------|----------------------------------|------------------------------------------------------------------------------------------------------------------------|------------------------------------|-----------------------------------------------------|--------------------|
| Fluorcarletonite  | Murun (Russia)                   | KNa <sub>4</sub> Ca <sub>4</sub> Si <sub>8</sub> O <sub>18</sub> (CO <sub>3</sub> ) <sub>4</sub> F·H <sub>2</sub> O    | 662, 690, 728, 782, 875            | CO <sub>3</sub> <sup>2-</sup> bending               | This study         |
|                   |                                  |                                                                                                                        | 1393, 1450, 1477, 1525             | CO <sub>3</sub> <sup>2-</sup> stretching            |                    |
|                   |                                  |                                                                                                                        | 1623                               | H <sub>2</sub> O bending                            |                    |
|                   |                                  |                                                                                                                        | 3436                               | H <sub>2</sub> O stretching                         |                    |
|                   |                                  |                                                                                                                        | 3555                               | OH <sup>-</sup> stretching                          |                    |
| Carletonite       | Mont Saint-Hilaire (Canada)      | KNa <sub>4</sub> Ca <sub>4</sub> Si <sub>8</sub> O <sub>18</sub> (CO <sub>3</sub> ) <sub>4</sub> (OH)·H <sub>2</sub> O | 650, 685, 694, 697                 | CO <sub>3</sub> <sup>2-</sup> planar bending        | Chao, 1971         |
|                   |                                  |                                                                                                                        | 860, 868                           | CO <sub>3</sub> <sup>2-</sup> bending               |                    |
|                   |                                  |                                                                                                                        | 1388, 1400, 1408, 1442, 1472, 1520 | CO <sub>3</sub> <sup>2-</sup> asymmetric stretching |                    |
|                   |                                  |                                                                                                                        | 1715, 1760                         | H <sub>2</sub> O bending                            |                    |
|                   |                                  |                                                                                                                        | 3580, 3640                         | OH <sup>-</sup> stretching                          |                    |
| Carletonite       | Mont Saint-Hilaire (Canada)      | KNa <sub>4</sub> Ca <sub>4</sub> Si <sub>8</sub> O <sub>18</sub> (CO <sub>3</sub> ) <sub>4</sub> (OH)·H <sub>2</sub> O | 1020, 1046, 1071                   | CO <sub>3</sub> <sup>2-</sup> stretching            | Frost et al., 2013 |
|                   |                                  |                                                                                                                        | 1395, 1449, 1479, 1522             | CO <sub>3</sub> <sup>2-</sup> stretching            |                    |
|                   |                                  |                                                                                                                        | 1602, 1623                         | H <sub>2</sub> O stretching                         |                    |
|                   |                                  |                                                                                                                        | 2998, 3126, 3398, 3624             | H <sub>2</sub> O stretching                         |                    |
| Apophyllite-(KF)  | Pune District (India)            | KCa <sub>4</sub> Si <sub>8</sub> O <sub>20</sub> F·8H <sub>2</sub> O                                                   | 2682, 2934, 3003, 3133, 3417       | H <sub>2</sub> O bonds                              | Frost and Xi, 2012 |
|                   |                                  |                                                                                                                        | 3538, 3553                         | OH <sup>-</sup> stretching                          |                    |
| Apophyllite-(KF)  | Palabora Open Pit (South Africa) | KCa <sub>4</sub> Si <sub>8</sub> O <sub>20</sub> F·8H <sub>2</sub> O                                                   | 2808, 3003, 3073, 3419             | H <sub>2</sub> O bonds                              | Frost and Xi, 2012 |
|                   |                                  |                                                                                                                        | 3540, 3554                         | OH <sup>-</sup> stretching                          |                    |
| Apophyllite-(KOH) | Christmas Mine (USA)             | KCa <sub>4</sub> Si <sub>8</sub> O <sub>20</sub> (F,OH)·8H <sub>2</sub> O                                              | 2637, 3837, 3989, 3083, 3414       | H <sub>2</sub> O bonds                              | Frost and Xi, 2012 |
|                   |                                  |                                                                                                                        | 3547, 3559                         | OH <sup>-</sup> stretching                          |                    |
| Delhayelite       | Khibiny (Russia)                 | K <sub>4</sub> Na <sub>2</sub> Ca <sub>2</sub> [AlSi <sub>7</sub> O <sub>19</sub> ]F <sub>2</sub> Cl                   | 1020                               | Si-OH stretching                                    | Pekov et al., 2009 |
|                   |                                  |                                                                                                                        | 1640                               | H <sub>2</sub> O bending                            |                    |
|                   |                                  |                                                                                                                        | 3450                               | H <sub>2</sub> O stretching                         |                    |

1

2

3

4

5

6

7

8

9

10

11

12

13

|                  |                            |                                                                                                                              |                   |                                         |                        |
|------------------|----------------------------|------------------------------------------------------------------------------------------------------------------------------|-------------------|-----------------------------------------|------------------------|
| Hydrodelhayelite | Khibiny (Russia)           | $\text{KCa}_2\text{AlSi}_7\text{O}_{17}(\text{OH})_2 \cdot 6\text{H}_2\text{O}$                                              | 1040<br>3200-3210 | Si-OH stretching<br>Si-OH silanol group | Pekov et al.,<br>2009  |
| Rhodesite        | Bultfontein (South Africa) | $\text{KNa}_2\text{Ca}_2\text{Si}_8\text{O}_{19}(\text{OH}) \cdot 6\text{H}_2\text{O}$                                       | 1040<br>3200-3210 | Si-OH stretching<br>Si-OH silanol group | Pekov et al.,<br>2009  |
| Surite           | Cruz del Sur (Argentina)   | $\text{Pb}(\text{Pb,Ca})_{1.17}(\text{Al,Fe,Mg})_2(\text{Si}_{3.6}\text{Al}_{0.4})\text{O}_{10}(\text{CO}_3)_2(\text{OH})_2$ | 690, 840, 1430    | $\text{CO}_3^{2-}$ bonds                | Hayase et al.,<br>1978 |

1 Table S5. Crystallographic data for the studied fluorcarletonite and literature selected structurally related phyllosilicates.

| Mineral            | Chemical formula                                                                                   | Sp. gr.                       | Parameters of unit cell                                                                                                   | References                    |
|--------------------|----------------------------------------------------------------------------------------------------|-------------------------------|---------------------------------------------------------------------------------------------------------------------------|-------------------------------|
| Fluorcarletonite   | $\text{KNa}_4\text{Ca}_4\text{Si}_8\text{O}_{18}(\text{CO}_3)_4\text{F}\cdot\text{H}_2\text{O}$    | Tetragonal<br><i>P4/mbm</i>   | $a = 13.1808(5) \text{ \AA}$ ,<br>$c = 16.6980(8) \text{ \AA}$                                                            | This study                    |
| Carletonite        | $\text{KNa}_4\text{Ca}_4\text{Si}_8\text{O}_{18}(\text{CO}_3)_4(\text{OH})\cdot\text{H}_2\text{O}$ | Tetragonal<br><i>P4/mbm</i>   | $a = 13.178(3) \text{ \AA}$ ,<br>$c = 16.695(4) \text{ \AA}$                                                              | Chao, 1971                    |
| Delhayelite        | $\text{K}_4\text{Na}_2\text{Ca}_2[\text{AlSi}_7\text{O}_{19}]\text{F}_2\text{Cl}$                  | Orthorhombic<br><i>Pmmn</i>   | $a = 24.86(1) \text{ \AA}$ ,<br>$b = 7.07(2) \text{ \AA}$ ,<br>$c = 6.53(1) \text{ \AA}$                                  | Cannillo <i>et al.</i> , 1969 |
| Hydrodelhayelite   | $\text{KCa}_2\text{AlSi}_7\text{O}_{17}(\text{OH})_2\cdot 6\text{H}_2\text{O}$                     | Orthorhombic<br><i>Pnm2_1</i> | $a = 6.648 \text{ \AA}$ ,<br>$b = 23.846 \text{ \AA}$ ,<br>$c = 7.073 \text{ \AA}$                                        | Dorfman and Chiragov, 1979    |
| Rhodesite          | $\text{KNa}_2\text{Ca}_2\text{Si}_8\text{O}_{19}(\text{OH})\cdot 6\text{H}_2\text{O}$              | Orthorhombic<br><i>Pman</i>   | $a = 23.42 \text{ \AA}$ ,<br>$b = 6.55 \text{ \AA}$ ,<br>$c = 7.01 \text{ \AA}$                                           | Hesse and Liebau, 1992        |
| Macdonaldite       | $\text{BaCa}_4\text{Si}_{16}\text{O}_{36}(\text{OH})_2\cdot 10\text{H}_2\text{O}$                  | Orthorhombic<br><i>Cmcm</i>   | $a = 14.06 \text{ \AA}$ ,<br>$b = 23.52 \text{ \AA}$ ,<br>$c = 13.08 \text{ \AA}$                                         | Cannillo <i>et al.</i> , 1968 |
| Monteregianite-(Y) | $\text{Na}_4\text{K}_2\text{Y}_2\text{Si}_{16}\text{O}_{38}\cdot 10\text{H}_2\text{O}$             | Monoclinic<br><i>P2_1/n</i>   | $a = 9.512(2) \text{ \AA}$ ,<br>$b = 23.956(4) \text{ \AA}$ ,<br>$c = 9.617(2) \text{ \AA}$ ,<br>$\beta = 93.85(1)^\circ$ | Ghose et al., 1987            |

2

3

4

5

1 Figure S1. Curves of thermal effects (TG, DSC) and mass spectra (dependences of ion current  $I$   
 2 on temperature  $T$ ) of gaseous thermolysis products: release of H<sub>2</sub>O (m.n. 18) upon sample  
 3 heating from fluorcarletonite crystal structure

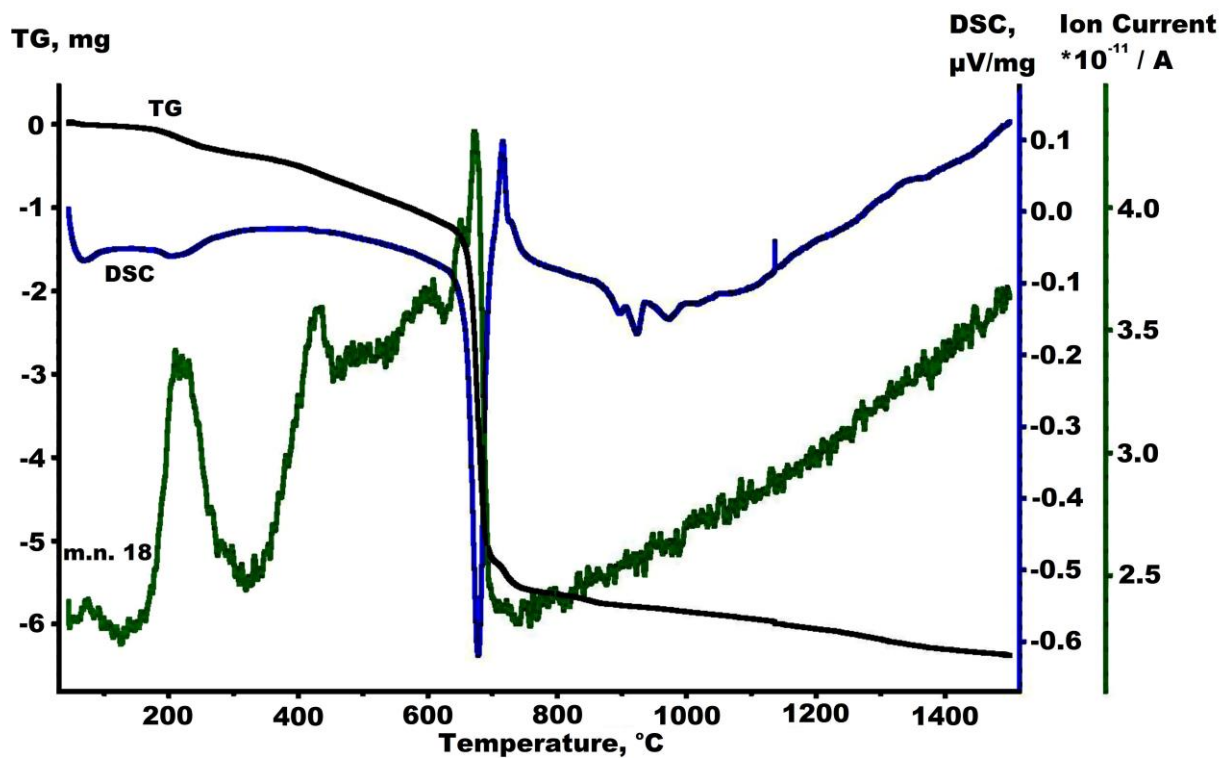

1 Figure S2. Curves of thermal effects (TG, DSC) and mass spectra (dependences of ion current  $I$   
 2 on temperature  $T$ ) of gaseous thermolysis products: release of F (m.n. 19) upon sample heating  
 3 from fluorocarletonite crystal structure

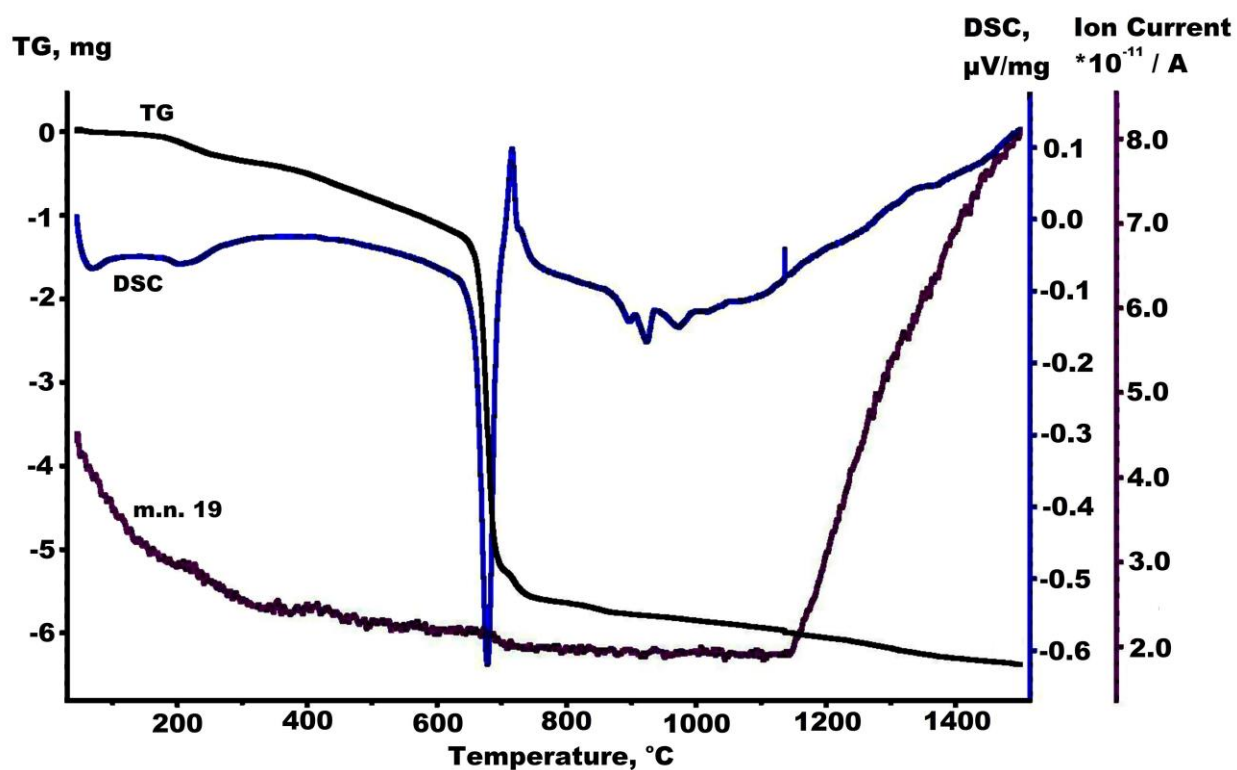



- 1 Figure S3. Curves of thermal effects (TG, DSC) upon fluorcarletonite sample heating and
- 2 cooling

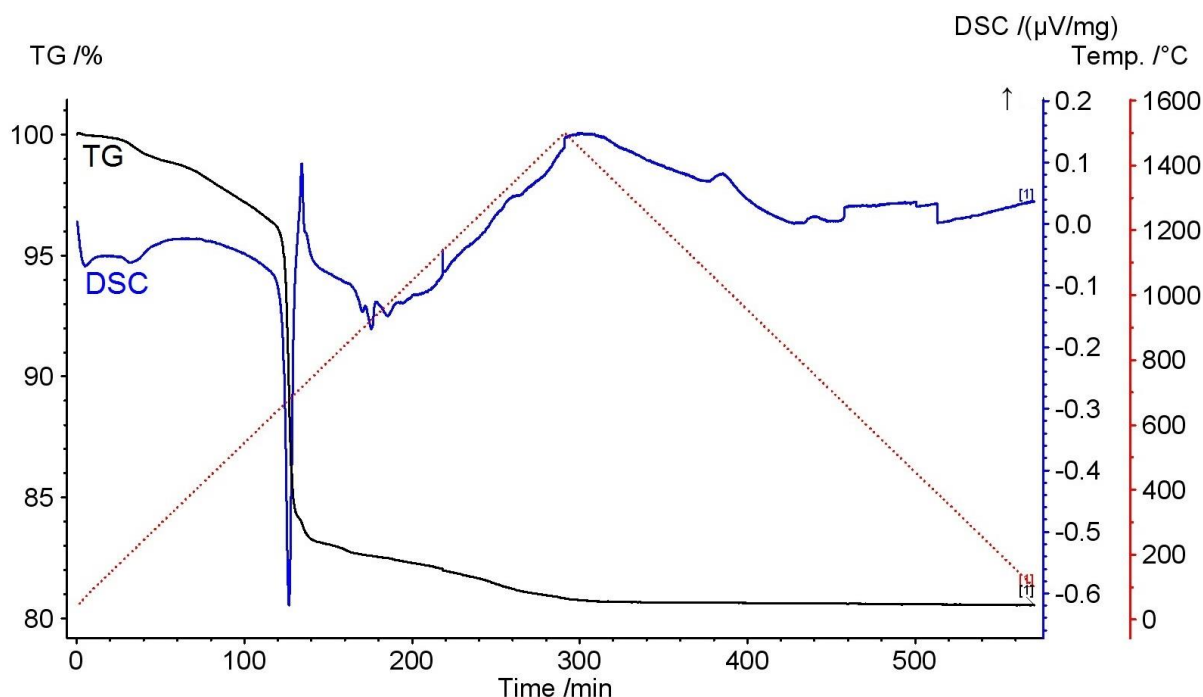

- 3
- 4
- 5

## 6 References

- 7 Cannillo, E., Rossi, G., and Ungaretti, L.: The crystal structure of macdonaldite. Locality
- 8 Fresno County, California, USA, Atti della Accademia Nazionale dei Lincei, Rend Classe Sci
- 9 Fis Mat Nat, serie VIII, 45, 399 – 414, 1968.
- 10 Cannillo, E., Rossi, G., and Ungaretti L.: The crystal structure of delhayelite, Rendiconti
- 11 della SIMP, 26, 63 – 75, 1969.
- 12 Chao, G.Y.: Carletonite,  $\text{KNa}_4\text{Ca}_4\text{Si}_8\text{O}_{18}(\text{CO}_3)_4(\text{F},\text{OH})\cdot\text{H}_2\text{O}$ , a new mineral from Mount St.
- 13 Hilaire, Quebec, Am. Min., 56, 1855 – 1865, 1971.
- 14 Chao, G.Y.: The crystal structure of carletonite,  $\text{KNa}_4\text{Ca}_4\text{Si}_8\text{O}_{18}(\text{CO}_3)_4(\text{F},\text{OH})\cdot\text{H}_2\text{O}$ , a
- 15 double-sheet silicate, Am. Min., 57, 765 – 778, 1972.

Ghose, S., Gupta, P.K.S., and Campana, C.F.: Symmetry and crystal structure of  
 montregianite,  $\text{Na}_4\text{K}_2\text{Y}_2\text{Si}_{16}\text{O}_{38} \cdot 10\text{H}_2\text{O}$ , a double-sheet silicate with zeolitic properties, *Am.*  
*Min.*, 72, 365 – 374, 1987.

Dorfman M.D., Chiragov M.I.: Hydrodelhayelite, a product of supergene alteration of  
 delhayelite, *New Data on Minerals of the USSR*, 28, 172 – 175.

Frost, R.L., and Xi, Y.: Raman spectroscopic study of the minerals apophyllite-(KF)  
 $\text{KCa}_4\text{Si}_8\text{O}_{20}\text{F} \cdot 8\text{H}_2\text{O}$  and apophyllite-(KOH)  $\text{KCa}_4\text{Si}_8\text{O}_{20}(\text{F},\text{OH}) \cdot 8\text{H}_2\text{O}$ , *J. Mol. Str.*, 1028, 200 –  
 207, <https://doi.org/10.1016/j.molstruc.2012.06.005>, 2012.

Frost, R.L., Xi, Y., Scholz, R., López, A., and Belotti, F.M.: Infrared and Raman  
 spectroscopic characterization of the silicate-carbonate mineral carletonite -  
 $\text{KNa}_4\text{Ca}_4\text{Si}_8\text{O}_{18}(\text{CO}_3)_4(\text{F},\text{OH}) \cdot \text{H}_2\text{O}$ , *J. Mol. Str.*, 1042, 1 – 7,  
<https://doi.org/10.1016/j.molstruc.2013.03.036>, 2013.

Hayase, K., Dristas, J., Tsutsumi, S., Otsuka, R., Tanabe, S., Sudo, T., and Nishiyama, T.:  
 Surite, a new Pb-rich layer silicate mineral, *Am. Min.*, 63, 1175 – 1181, 1978.

Hesse, K.-F., and Liebau F.: Crystal structure of rhodesite,  $\text{HK}_{1-x}\text{Na}_{x+2y}\text{Ca}_{2-}$   
 $y\{1B,3,2^2_\infty\}[\text{Si}_8\text{O}_{19}] \cdot (6-z)\text{H}_2\text{O}$ , from three localities and its relation to other silicates with drier  
 double layer, *Z. Kristallogr.*, 199, 25 – 48, <https://doi.org/10.1524/zkri.1992.199.14.25>, 1992.

Pekov, I.V., Zubkova, N.V., Chukanov, N.V., Sharygin, V.V., and Pushcharovsky, D.Yu.:  
 Crystal chemistry of delhayelite and hydrodelhayelite, *Dokl. Earth Sci.*, 428 (7), 1216 – 1221,  
<https://doi.org/10.1134/S1028334X09070393>, 2009.
