# Supplementary material for: Crystal chemistry of fluorcarletonite, a new mineral from the Murun alkaline complex (Russia)
Source: Copernicus journal article supplement (doi:10.5194/ejm-32-137-2020), 2020-01-29
Supplement: Supplementary file 2 [file ejm-32-137-2020-supplement.zip]

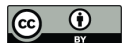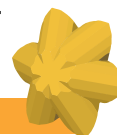

*Supplement of*

**Crystal chemistry of fluorcarletonite, a new mineral from the Murun  
alkaline complex (Russia)**

**Ekaterina Kaneva et al.**

*Correspondence to:* Ekaterina Kaneva (kev604@mail.ru)

- ejm-32-137-2020-supplement-title-page.pdf
- Fluorcarletonite.cif
- Kaneva\_Supplement S1.pdf

The copyright of individual parts of the supplement might differ from the CC BY 4.0 License.
